# Supplementary material for: Solute–solvent interactions in the (N,N-dimethylformamide + N-methylformamide + water) ternary system at 298.15 K
Source: Royal Society of Chemistry journal article supplement (doi:10.1039/b102402g), 2001-01-01
Supplement: tables.pdf [file tables.pdf]

**Table S1** Comparison of measured densities ( $\text{g cm}^{-3}$ ) and dynamic viscosities ( $\text{mPa s}$ ) of the pure solvents with literature values at 298.15 K

| Solvent               |                      |                        | $\eta$ |                         |
|-----------------------|----------------------|------------------------|--------|-------------------------|
|                       | Expt.                | Lit.                   | Expt.  | Lit.                    |
| DMF                   | 0.94406              | 0.94387 <sup>2</sup>   | 0.805  | 0.802 <sup>2</sup>      |
|                       |                      | 0.9438 <sup>15</sup>   |        | 0.80 <sup>16</sup>      |
|                       |                      | 0.9444 <sup>16</sup>   |        | 0.8024 <sup>15,23</sup> |
|                       |                      | 0.9445 <sup>17</sup>   |        |                         |
|                       |                      | 0.94393 <sup>18</sup>  |        |                         |
|                       |                      | 0.94332 <sup>19</sup>  |        |                         |
|                       |                      | 0.94539 <sup>20</sup>  |        |                         |
|                       |                      | 0.94383 <sup>21</sup>  |        |                         |
|                       |                      | 0.9436 <sup>22</sup>   |        |                         |
|                       |                      | NMF                    |        | 0.99929                 |
| 0.9988 <sup>16</sup>  | 1.6503 <sup>23</sup> |                        |        |                         |
| 0.99989 <sup>21</sup> |                      |                        |        |                         |
| 0.9990 <sup>22</sup>  |                      |                        |        |                         |
| WATER                 | 0.99704              | 0.9970474 <sup>2</sup> | 0.890  | 0.89025 <sup>2</sup>    |
|                       |                      | 0.9970 <sup>16</sup>   |        | 0.89 <sup>16</sup>      |
|                       |                      | 0.99704 <sup>24</sup>  |        | 0.8937 <sup>25</sup>    |
|                       |                      | 0.99705 <sup>26</sup>  |        |                         |
|                       |                      | 0.997048 <sup>27</sup> |        |                         |

**Table S2** Experimental densities ( $\text{g cm}^{-3}$ ), dynamic viscosities ( $\text{mPa s}$ ), excess molar volumes  $V_m^E$  ( $\text{cm}^3 \text{mol}^{-1}$ ), mixing viscosities  $\Delta_{mix} \mathbf{h}$  ( $\text{mPa s}$ ) and molar excess Gibbs energies for the activation of viscous flow  $\Delta G_m^{*E}$  ( $\text{kJ mol}^{-1}$ ) for the DMF (1) + NMF (2) mixture at 298.15 K

| $x_1$  |         |       | $V_m^E$ | $\Delta_{mix} \mathbf{h}$ | $\Delta G_m^{*E}$ |
|--------|---------|-------|---------|---------------------------|-------------------|
| 0.0335 | 0.99679 | 1.674 | -0.0011 | -0.054                    | -0.055            |
| 0.0715 | 0.99403 | 1.605 | -0.0028 | -0.087                    | -0.081            |
| 0.1058 | 0.99161 | 1.548 | -0.0042 | -0.111                    | -0.100            |
| 0.1496 | 0.98861 | 1.483 | -0.0066 | -0.134                    | -0.117            |
| 0.1855 | 0.98622 | 1.431 | -0.0082 | -0.152                    | -0.133            |
| 0.2229 | 0.98380 | 1.380 | -0.0108 | -0.167                    | -0.148            |
| 0.2584 | 0.98154 | 1.335 | -0.0114 | -0.178                    | -0.159            |
| 0.3065 | 0.97860 | 1.279 | -0.0150 | -0.188                    | -0.169            |
| 0.3498 | 0.97601 | 1.231 | -0.0163 | -0.195                    | -0.178            |
| 0.4014 | 0.97302 | 1.179 | -0.0181 | -0.198                    | -0.184            |
| 0.4381 | 0.97097 | 1.146 | -0.0207 | -0.196                    | -0.183            |
| 0.4883 | 0.96821 | 1.101 | -0.0213 | -0.193                    | -0.185            |
| 0.5366 | 0.96564 | 1.062 | -0.0223 | -0.186                    | -0.181            |
| 0.5865 | 0.96306 | 1.025 | -0.0229 | -0.175                    | -0.173            |
| 0.6943 | 0.95770 | 0.954 | -0.0207 | -0.143                    | -0.146            |
| 0.7529 | 0.95492 | 0.921 | -0.0188 | -0.120                    | -0.123            |
| 0.8197 | 0.95182 | 0.887 | -0.0127 | -0.090                    | -0.092            |
| 0.8708 | 0.94954 | 0.862 | -0.0092 | -0.066                    | -0.068            |

**Table S3** Excess molar volumes  $V_{m,123}^E$  ( $\text{cm}^3 \text{mol}^{-1}$ ), mixing viscosities  $\Delta_{mix} \mathbf{h}_{123}$  (mPa s) and molar excess Gibbs energies for the activation of viscous flow  $\Delta G_{m,123}^{*E}$  ( $\text{kJ mol}^{-1}$ ) for the DMF (1) + NMF (2) + WATER (3) ternary mixture at 298.15 K

| $x_1$  | $x_2$  | $V_{m,123}^E$ | $\Delta_{mix} \mathbf{h}_{123}$ | $\Delta G_{m,123}^{*E}$ | $x_1$  | $x_2$  | $V_{m,123}^E$ | $\Delta_{mix} \mathbf{h}_{123}$ | $\Delta G_{m,123}^{*E}$ |
|--------|--------|---------------|---------------------------------|-------------------------|--------|--------|---------------|---------------------------------|-------------------------|
| 0.0113 | 0.1087 | -0.3021       | 0.491                           | -2.648                  | 0.2232 | 0.5536 | -0.4340       | 0.243                           | -0.179                  |
| 0.0211 | 0.1806 | -0.4613       | 0.732                           | -1.853                  | 0.2348 | 0.0998 | -0.8930       | 1.317                           | -0.273                  |
| 0.0236 | 0.0570 | -0.2268       | 0.420                           | -3.004                  | 0.2374 | 0.5952 | -0.2558       | 0.066                           | -0.273                  |
| 0.0252 | 0.0502 | -0.2195       | 0.398                           | -3.072                  | 0.2641 | 0.1735 | -0.8615       | 1.064                           | -0.153                  |
| 0.0333 | 0.2052 | -0.5262       | 0.828                           | -1.533                  | 0.2811 | 0.0223 | -0.9879       | 1.530                           | -0.091                  |
| 0.0462 | 0.4304 | -0.5785       | 0.764                           | -0.636                  | 0.3005 | 0.0534 | -0.9817       | 1.406                           | -0.011                  |
| 0.0546 | 0.1159 | -0.4671       | 0.788                           | -1.897                  | 0.3167 | 0.5953 | -0.1561       | -0.081                          | -0.250                  |
| 0.0561 | 0.1338 | -0.4995       | 0.843                           | -1.727                  | 0.3186 | 0.1212 | -0.9348       | 1.106                           | -0.028                  |
| 0.0568 | 0.4899 | -0.5379       | 0.658                           | -0.504                  | 0.3292 | 0.2219 | -0.7801       | 0.746                           | -0.100                  |
| 0.0723 | 0.0294 | -0.3608       | 0.708                           | -2.326                  | 0.3537 | 0.1288 | -0.9183       | 0.982                           | 0.006                   |
| 0.0730 | 0.5812 | -0.4390       | 0.465                           | -0.372                  | 0.3673 | 0.0303 | -1.0623       | 1.330                           | 0.148                   |
| 0.0734 | 0.1778 | -0.5996       | 0.968                           | -1.263                  | 0.3871 | 0.0655 | -1.0111       | 1.132                           | 0.128                   |
| 0.0791 | 0.6886 | -0.3030       | 0.264                           | -0.274                  | 0.3915 | 0.2658 | -0.6404       | 0.451                           | -0.134                  |
| 0.0795 | 0.1742 | -0.6114       | 0.976                           | -1.232                  | 0.4494 | 0.0447 | -1.0209       | 0.998                           | 0.164                   |
| 0.0865 | 0.0474 | -0.4569       | 0.858                           | -1.920                  | 0.4536 | 0.3160 | -0.4904       | 0.217                           | -0.135                  |
| 0.0943 | 0.8026 | -0.1377       | 0.046                           | -0.180                  | 0.4679 | 0.1684 | -0.7430       | 0.513                           | -0.058                  |
| 0.1095 | 0.2420 | -0.6934       | 1.009                           | -0.747                  | 0.4783 | 0.0881 | -0.9048       | 0.753                           | 0.088                   |
| 0.1367 | 0.3108 | -0.6907       | 0.906                           | -0.471                  | 0.5170 | 0.3354 | -0.3025       | 0.034                           | -0.202                  |
| 0.1397 | 0.3189 | -0.6868       | 0.868                           | -0.473                  | 0.5387 | 0.3640 | -0.2265       | -0.050                          | -0.213                  |
| 0.1424 | 0.0238 | -0.6252       | 1.189                           | -1.245                  | 0.5406 | 0.0933 | -0.8067       | 0.552                           | 0.036                   |
| 0.1475 | 0.0557 | -0.6854       | 1.221                           | -1.039                  | 0.5936 | 0.0480 | -0.8319       | 0.531                           | 0.050                   |
| 0.1657 | 0.3793 | -0.6303       | 0.708                           | -0.339                  | 0.5941 | 0.2260 | -0.3963       | 0.103                           | -0.172                  |
| 0.1736 | 0.3737 | -0.6346       | 0.688                           | -0.348                  | 0.6403 | 0.1152 | -0.5702       | 0.258                           | -0.070                  |
| 0.1757 | 0.0193 | -0.7332       | 1.351                           | -0.878                  | 0.6918 | 0.0623 | -0.6002       | 0.269                           | -0.054                  |
| 0.1802 | 0.0651 | -0.7858       | 1.333                           | -0.685                  | 0.7033 | 0.2584 | -0.1283       | -0.098                          | -0.177                  |
| 0.1953 | 0.4709 | -0.4934       | 0.427                           | -0.284                  | 0.7100 | 0.1290 | -0.3843       | 0.113                           | -0.104                  |
| 0.1959 | 0.4618 | -0.5060       | 0.429                           | -0.309                  | 0.7651 | 0.0734 | -0.4026       | 0.127                           | -0.091                  |
| 0.2056 | 0.5730 | -0.3296       | 0.185                           | -0.272                  | 0.8022 | 0.1416 | -0.1393       | -0.019                          | -0.096                  |
| 0.2073 | 0.1360 | -0.8429       | 1.237                           | -0.370                  | 0.8565 | 0.0846 | -0.1786       | 0.005                           | -0.080                  |
| 0.2132 | 0.5216 | -0.4014       | 0.274                           | -0.271                  |        |        |               |                                 |                         |

**Table S4** Standard deviation  $F$  of the semiempirical models for the DMF (1) + NMF (2) + WATER (3) ternary mixture at 298.15 K; for asymmetric equations the component 1 is: (a) DMF, (b) NMF and (c) WATER

| Model             | $V_{m,123}^E$       |                     |                     | $\Delta_{mix}h_{123}$ |                     |                     | $\Delta G_{m,123}^{*E}$ |                     |                     |
|-------------------|---------------------|---------------------|---------------------|-----------------------|---------------------|---------------------|-------------------------|---------------------|---------------------|
| Köhler            | 0.0809              |                     |                     | 0.2127                |                     |                     | 0.4125                  |                     |                     |
| Jacob and Fitzner | 0.0655              |                     |                     | 0.1413                |                     |                     | 0.2417                  |                     |                     |
| Colinet           | 0.0622              |                     |                     | 0.1626                |                     |                     | 0.3141                  |                     |                     |
| Tsao and Smith    | 0.0390 <sup>a</sup> | 0.1586 <sup>b</sup> | 0.1725 <sup>c</sup> | 0.1597 <sup>a</sup>   | 0.4325 <sup>b</sup> | 0.2390 <sup>c</sup> | 0.2757 <sup>a</sup>     | 0.6903 <sup>b</sup> | 0.5244 <sup>c</sup> |
| Toop              | 0.0691 <sup>a</sup> | 0.0760 <sup>b</sup> | 0.1752 <sup>c</sup> | 0.0792 <sup>a</sup>   | 0.3269 <sup>b</sup> | 0.2132 <sup>c</sup> | 0.1497 <sup>a</sup>     | 0.4549 <sup>b</sup> | 0.5012 <sup>c</sup> |
| Scatchard         | 0.0668 <sup>a</sup> | 0.0211 <sup>b</sup> | 0.1750 <sup>c</sup> | 0.0563 <sup>a</sup>   | 0.1033 <sup>b</sup> | 0.2115 <sup>c</sup> | 0.1032 <sup>a</sup>     | 0.1405 <sup>b</sup> | 0.5011 <sup>c</sup> |
